# Supplementary figures and images for: The Effect of Isolated and Combined Application of Menthol and Carbohydrate Mouth Rinses on 40 km Time Trial Performance, Physiological and Perceptual Measures in the Heat
Source: MDPI journal article supplement (doi:10.3390/nu13124309), 2021-11-29

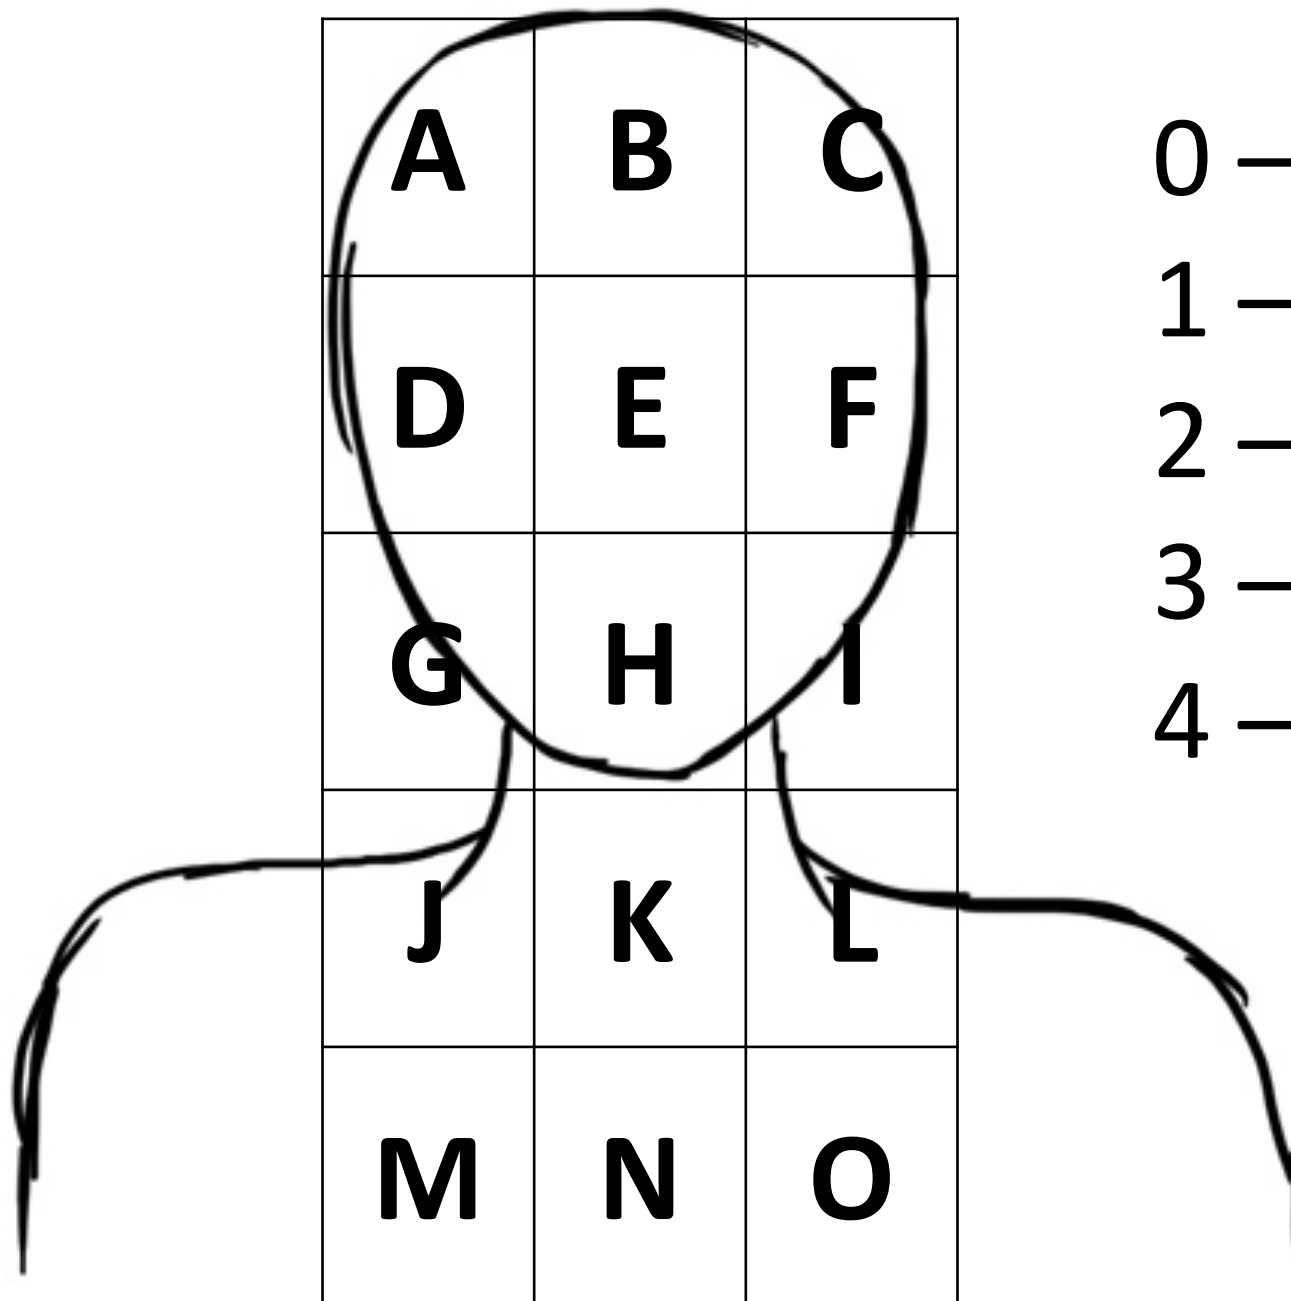

0 – None  
1 – Weak  
2 – Moderate  
3 – Strong  
4 – Very Strong

Supplement: s1 [file s1]
